# Supplementary material for: Radiologist-initiated double reading of abdominal CT: retrospective analysis of the clinical importance of changes to radiology reports
Source: PubMed Central journal article supplement — BMJ Qual Saf. 2016 Mar 24;25(8):595–603. doi: 10.1136/bmjqs-2015-004536 (PMC4975845; doi:10.1136/bmjqs-2015-004536), 2016-03-24
Supplement: bmjqs-2015-004536supp_appendix2.pdf [file bmjqs-2015-004536supp_appendix2.pdf]

Appendix 2: Examples of report changes with corresponding rating of clinical importance and change in severity.

| <b>Clinical presentation</b>                                                                                                      | <b>Main imaging finding in preliminary report*</b>                                                                                                                                                     | <b>Information added to final report</b>                                                                                                                                                                                                                                                                             | <b>Clinical rating</b> | <b>Change in severity</b> |
|-----------------------------------------------------------------------------------------------------------------------------------|--------------------------------------------------------------------------------------------------------------------------------------------------------------------------------------------------------|----------------------------------------------------------------------------------------------------------------------------------------------------------------------------------------------------------------------------------------------------------------------------------------------------------------------|------------------------|---------------------------|
| Female, 54 years old. Previous abdominal surgery. Severe abdominal pain and vomiting. Ileus?                                      | <i>Slightly distended small intestine with some air-fluid levels consistent with incomplete ileus.</i>                                                                                                 | Distended loops in the small intestine with air-fluid levels. Distinct transition zone in the pelvis with suspected adhesions, and collapsed distal loops consistent with intestinal obstruction.                                                                                                                    | Critical               | Increased                 |
| Female, 41 years old. Stoma reversal 3 days ago. CRP <sup>1</sup> : 430 despite antibiotic treatment. Anastomotic leak?           | <i>Small amounts of fluid and a few air bubbles as expected after surgery. No signs of abscess or anastomotic leakage.</i>                                                                             | Large fluid collection adjacent to the anastomosis. Air bubbles and contrast enhancing margin consistent with abscess. Due to the proximity to the anastomosis, leakage is suspected.                                                                                                                                | Critical               | Increased                 |
| Female, 88 years old. Acute right lower quadrant abdominal pain today. Diarrhoea. Positive faecal occult blood test. Haemorrhage? | <i>Normal imaging findings.</i>                                                                                                                                                                        | Moderate atherosclerotic change in the aorta. Probable origin stenosis in the celiac trunk, and the left renal and superior mesenteric arteries. Contrast filling defect indicating a thrombus in the proximal superior mesenteric artery, but contrast filling in the distal vessel lumen. Mesenteric claudication? | Major                  | Increased                 |
| Female, 35 years old. Sub-acute abdominal pain. Ileus?                                                                            | <i>Distended ascending and transverse colon with fluid levels. Wall thickening in the descending colon with obscured haustra. In the junction of the descending and sigmoid colon there is a short</i> | Large bowel obstruction with distended ascending and transverse colon caused by a constricting tumour in the sigmoid colon. Multiple lymph nodes on mesenteric and anti-mesenteric border of the sigmoid colon (assessed as N2-status). Two low-density lesions in the                                               | Major                  | Increased                 |

|                                                                                                                                              |                                                                                                                 |                                                                                                                                                                |              |           |
|----------------------------------------------------------------------------------------------------------------------------------------------|-----------------------------------------------------------------------------------------------------------------|----------------------------------------------------------------------------------------------------------------------------------------------------------------|--------------|-----------|
|                                                                                                                                              | <i>segment with wall thickening and narrowing of the lumen. Mechanic obstruction is possible, but unlikely.</i> | liver segments 7 and 8. Metastases cannot be ruled out. MRI <sup>2</sup> is recommended.                                                                       |              |           |
| Male, 43 years old. Abdominal discomfort. Right lower quadrant tenderness. Normal rectoscopy (15 cm).                                        | Normal imaging findings.                                                                                        | Sharply circumscribed, 3 cm, low-density lesion with a contrast-enhancing margin in the head of the pancreas. No dilation of the pancreatic duct. Cystadenoma? | Intermediate | Increased |
| Female, 78 years old. No previous abdominal disease. Right-sided abdominal pain, nausea and fever today. WBC <sup>3</sup> : 19. Peritonitis. | Appendicitis. <i>Thickened, hyperaemic caecal wall, but no visible tumour. Malignancy? Inflammation?</i>        | Thickened, hyperaemic caecal wall is probably inflammation secondary to appendicitis. No visible tumour.                                                       | Intermediate | Decreased |

\*Text in *italics* has been substituted or removed in the final report.

<sup>1</sup>C-reactive protein (mg/L, reference range: < 5)

<sup>2</sup>Magnetic resonance imaging

<sup>3</sup>White blood cell count (10<sup>9</sup>/L, reference range: 3.5-10.0)
