# Supplementary figures and images for: Radiologist-initiated double reading of abdominal CT: retrospective analysis of the clinical importance of changes to radiology reports
Source: PubMed Central journal article supplement — BMJ Qual Saf. 2016 Mar 24;25(8):595–603. doi: 10.1136/bmjqs-2015-004536 (PMC4975845; doi:10.1136/bmjqs-2015-004536), 2016-03-24

Appendix 1: Report turnaround times (Boxplot).

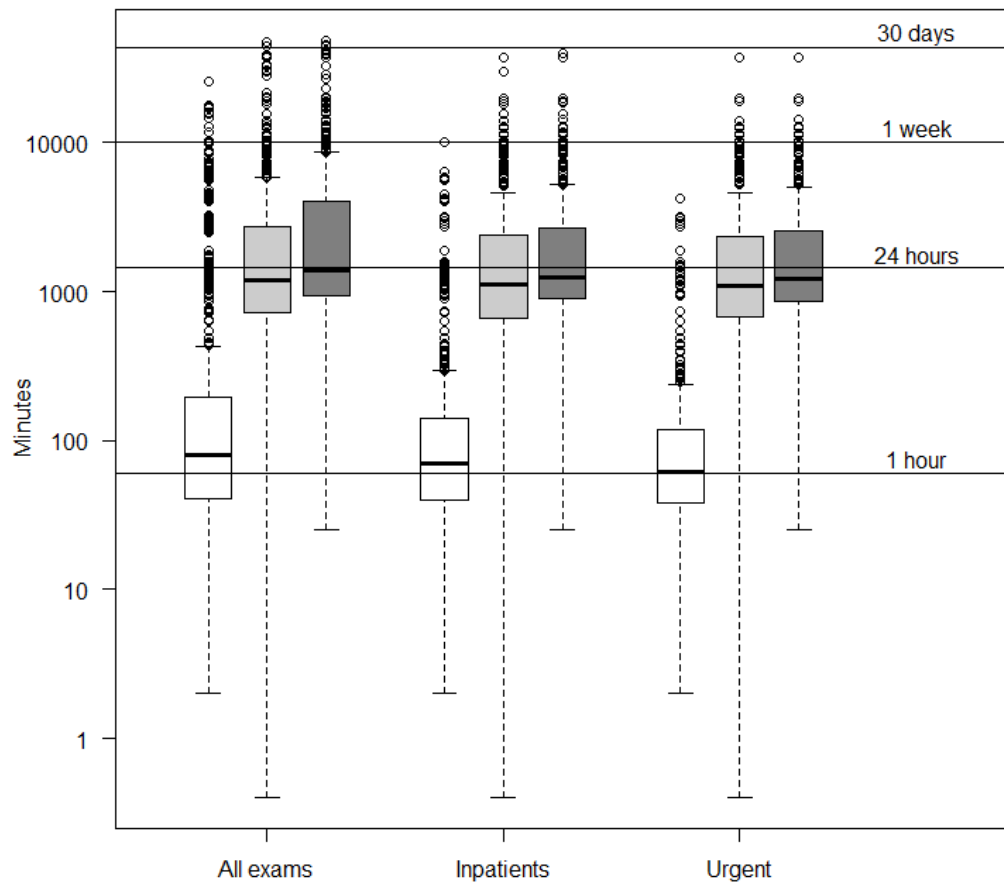

Supplement: bmjqs-2015-004536supp_appendix1.pdf [file bmjqs-2015-004536supp_appendix1.pdf]
